# Supplementary material
Source: publisher figshare collection journal article supplement (https://plos.figshare.com/articles/dataset/_/8296793)
Supplement: Supplementary file 1 [file 1 › pone.0218253.s002.pdf]

Table 1. GO terms from the biological process ontology

|    | GO Term                                                  | GO ID             | Genes Annotated to the GO Term                   | GO Term Usage in Gene List | Genome Frequency (out of 19497 annotated genes) |
|----|----------------------------------------------------------|-------------------|--------------------------------------------------|----------------------------|-------------------------------------------------|
| 1  | signal transduction                                      | GO:0007165        | <i>ARID5B, CD7, CTBP2, KIF13B, RNF213, TIMP2</i> | 6 of 12 genes, 50.00%      | 6030, 30.93%                                    |
| 2  | anatomical structure development                         | GO:0048856        | <i>ARID5B, CD7, CTBP2, KIF13B, RNF213, TIMP2</i> | 6 of 12 genes, 50.00%      | 5588, 28.66%                                    |
| 3  | biosynthetic process                                     | GO:0009058        | <i>ARID5B, CTBP2, MAFK, SARS</i>                 | 4 of 12 genes, 33.33%      | 6416, 32.91%                                    |
| 4  | cell differentiation                                     | GO:0030154        | <i>ARID5B, CTBP2, KIF13B, TIMP2</i>              | 4 of 12 genes, 33.33%      | 3981, 20.42%                                    |
| 5  | cellular nitrogen compound metabolic process             | GO:0034641        | <i>ARID5B, CTBP2, MAFK, SARS</i>                 | 4 of 12 genes, 33.33%      | 6622, 33.96%                                    |
| 6  | transport                                                | GO:0006810        | <i>KIF13B, PANX1, SLC24A2, TIMP2</i>             | 4 of 12 genes, 33.33%      | 4956, 25.42%                                    |
| 7  | <b>immune system process</b>                             | <b>GO:0002376</b> | <i>CD7, KIF13B, TIMP2</i>                        | 3 of 12 genes, 25.00%      | 2974, 15.25%                                    |
| 8  | cell-cell signaling                                      | GO:0007267        | <i>PANX1, RNF213, SLC24A2</i>                    | 3 of 12 genes, 25.00%      | 1593, 8.17%                                     |
| 9  | cellular protein modification process                    | GO:0006464        | <i>ARID5B, RNF213, TIMP2</i>                     | 3 of 12 genes, 25.00%      | 4113, 21.10%                                    |
| 10 | cellular component assembly                              | GO:0022607        | <i>PANX1, RNF213</i>                             | 2 of 12 genes, 16.67%      | 2713, 13.91%                                    |
| 11 | protein-containing complex assembly                      | GO:0065003        | <i>PANX1, RNF213</i>                             | 2 of 12 genes, 16.67%      | 1686, 8.65%                                     |
| 12 | anatomical structure formation involved in morphogenesis | GO:0048646        | <i>RNF213, SARS</i>                              | 2 of 12 genes, 16.67%      | 1020, 5.23%                                     |
| 13 | response to stress                                       | GO:0006950        | <i>MAFK, PANX1</i>                               | 2 of 12 genes, 16.67%      | 3830, 19.64%                                    |
| 14 | cell proliferation                                       | GO:0008283        | <i>CTBP2, TIMP2</i>                              | 2 of 12 genes, 16.67%      | 1973, 10.12%                                    |
| 15 | transmembrane transport                                  | GO:0055085        | <i>PANX1, SLC24A2</i>                            | 2 of 12 genes, 16.67%      | 1534, 7.87%                                     |
| 16 | catabolic process                                        | GO:0009056        | <i>RNF213, TIMP2</i>                             | 2 of 12 genes, 16.67%      | 2443, 12.53%                                    |
| 17 | reproduction                                             | GO:0000003        | <i>ARID5B</i>                                    | 1 of 12 genes, 8.33%       | 1391, 7.13%                                     |
| 18 | cytoskeleton-dependent intracellular transport           | GO:0030705        | <i>KIF13B</i>                                    | 1 of 12 genes, 8.33%       | 157, 0.81%                                      |
| 19 | nervous system process                                   | GO:0050877        | <i>SLC24A2</i>                                   | 1 of 12 genes, 8.33%       | 1364, 7.00%                                     |
| 20 | protein targeting                                        | GO:0006605        | <i>KIF13B</i>                                    | 1 of 12 genes, 8.33%       | 397, 2.04%                                      |
| 21 | homeostatic process                                      | GO:0042592        | <i>SLC24A2</i>                                   | 1 of 12 genes, 8.33%       | 1641, 8.42%                                     |
| 22 | cellular amino acid metabolic process                    | GO:0006520        | <i>SARS</i>                                      | 1 of 12 genes, 8.33%       | 367, 1.88%                                      |
| 23 | extracellular matrix organization                        | GO:0030198        | <i>TIMP2</i>                                     | 1 of 12 genes, 8.33%       | 335, 1.72%                                      |
| 24 | cytoskeleton organization                                | GO:0007010        | <i>FAM190B</i>                                   | 1 of 12 genes, 8.33%       | 1212, 6.22%                                     |
| 25 | translation                                              | GO:0006412        | <i>SARS</i>                                      | 1 of 12 genes, 8.33%       | 604, 3.10%                                      |
| 26 | mitotic cell cycle                                       | GO:0000278        | <i>TIMP2</i>                                     | 1 of 12 genes, 8.33%       | 976, 5.01%                                      |
| 27 | small molecule metabolic process                         | GO:0044281        | <i>SARS</i>                                      | 1 of 12 genes, 8.33%       | 2081, 10.67%                                    |
| 28 | vesicle-mediated transport                               | GO:0016192        | <i>TIMP2</i>                                     | 1 of 12 genes, 8.33%       | 2000, 10.26%                                    |
| 29 | symbiont process                                         | GO:0044403        | <i>CTBP2</i>                                     | 1 of 12 genes, 8.33%       | 841, 4.31%                                      |
| 30 | cell motility                                            | GO:0048870        | <i>ARID5B</i>                                    | 1 of 12 genes, 8.33%       | 1488, 7.63%                                     |
| 31 | cell morphogenesis                                       | GO:0000902        | <i>KIF13B</i>                                    | 1 of 12 genes, 8.33%       | 932, 4.78%                                      |
| 32 | tRNA metabolic process                                   | GO:0006399        | <i>SARS</i>                                      | 1 of 12 genes, 8.33%       | 188, 0.96%                                      |
| 33 | chromosome organization                                  | GO:0051276        | <i>ARID5B</i>                                    | 1 of 12 genes, 8.33%       | 1174, 6.02%                                     |
| 34 | aging                                                    | GO:0007568        | <i>TIMP2</i>                                     | 1 of 12 genes, 8.33%       | 284, 1.46%                                      |
| 35 | locomotion                                               | GO:0040011        | <i>ARID5B</i>                                    | 1 of 12 genes, 8.33%       | 1721, 8.83%                                     |
| 36 | growth                                                   | GO:0040007        | <i>ARID5B</i>                                    | 1 of 12 genes, 8.33%       | 922, 4.73%                                      |
| 37 | cell cycle                                               | GO:0007049        | <i>TIMP2</i>                                     | 1 of 12 genes, 8.33%       | 1793, 9.20%                                     |

The Generic Gene Ontology (GO) Term Mapper tool was used to map granular GO annotations to a broader, higher-level set of terms. Note that two genes, *ZNF252* and *TMED10P*, did not map to any GO terms. The “immune system process” term is of particular interest since FA has been previously linked with the immune system.
