# Supplementary material
Source: publisher figshare collection journal article supplement (https://plos.figshare.com/articles/dataset/_/8296793)
Supplement: Supplementary file 1 [file 1 › pone.0218253.s003.pdf]

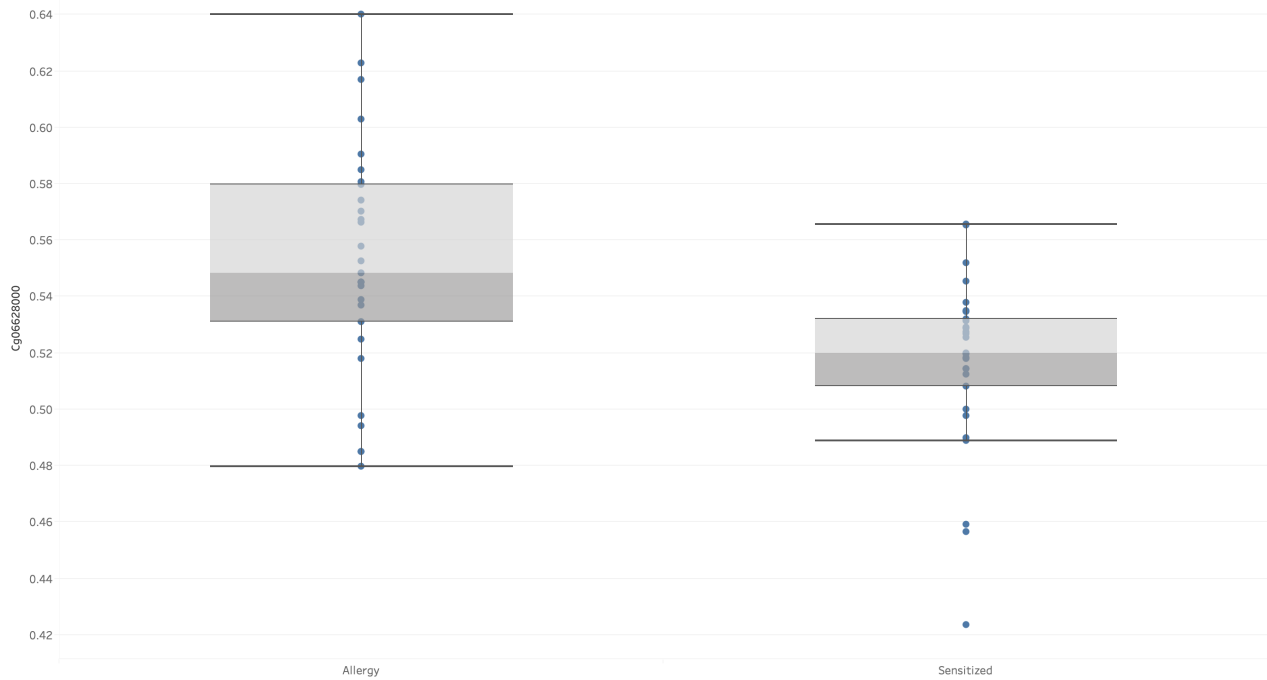

**Figure 1. Distribution of methylation values for cg06628000.** The methylation values are on average higher for samples associated with FA.

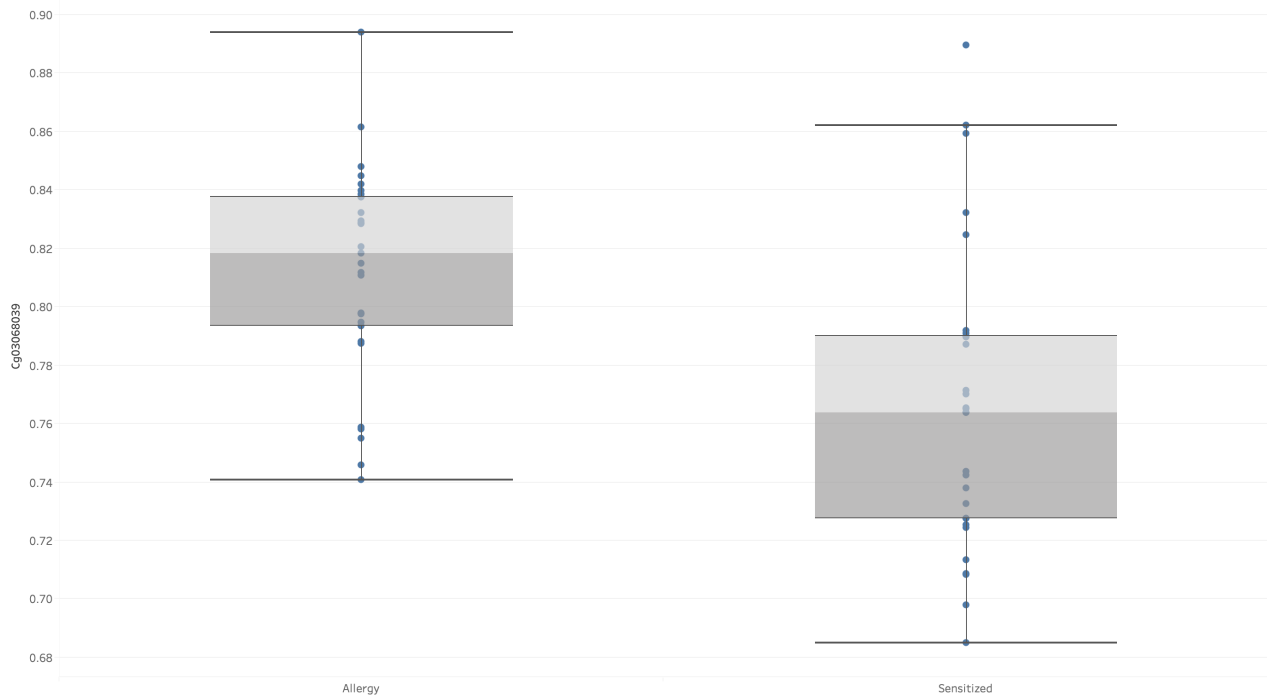

**Figure 2. Distribution of methylation values for cg03068039.** The methylation values are on average higher for samples associated with FA.

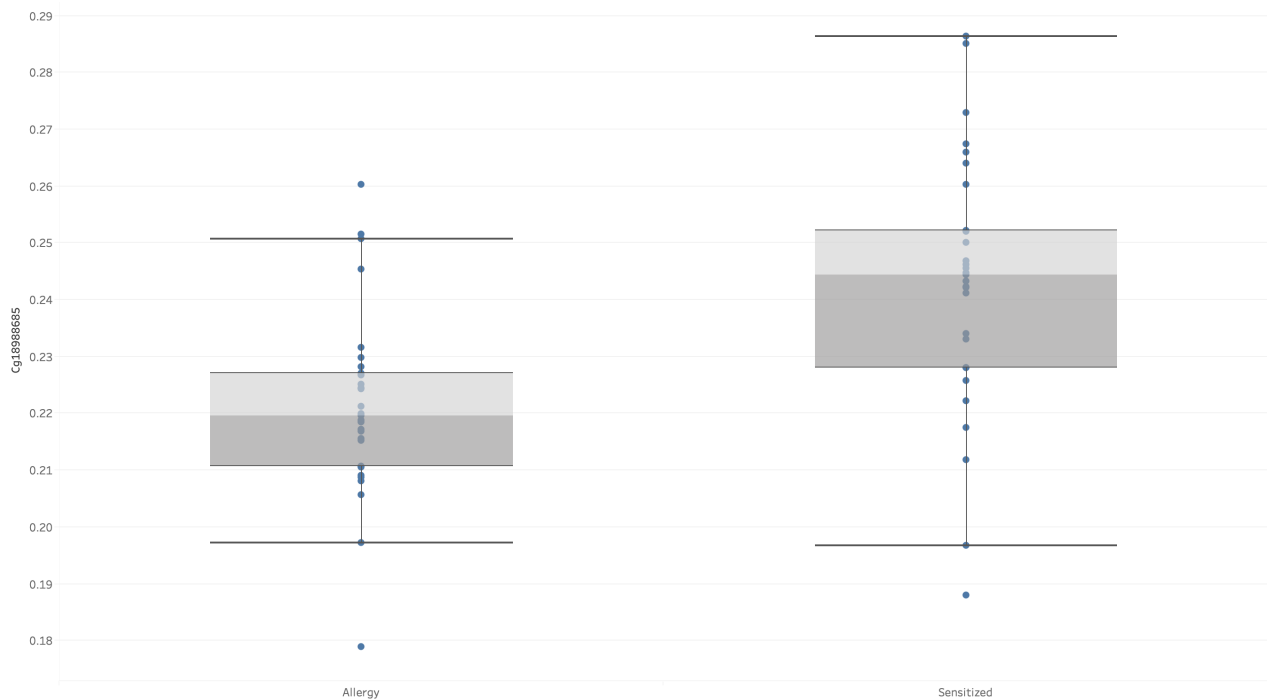

**Figure 3. Distribution of methylation values for cg18988685.** The methylation values are on average higher for samples associated with sensitized samples.
